# Supplementary material for: Different but Equal? How Nonmajors and Majors Approach and Learn Genetics
Source: Atypon-hosted journal article supplement (doi:10.1187/cbe.09-07-0047), 2010-03-01
Supplement: supp_mat_b.pdf [file supp_mat_b.pdf]

**Appendix B: Comparison of topic learning goals addressed within Learning Goal 1 in both non majors and majors genetics.**

**Learning Goal 1: Deduce information about genes, alleles, and gene functions from analysis of genetic crosses and patterns of inheritance.**

| <b>Topic learning goals</b>                                                                                                                                          | <b>Non majors (# classes)</b> | <b>Majors (# classes)</b> |
|----------------------------------------------------------------------------------------------------------------------------------------------------------------------|-------------------------------|---------------------------|
| Draw a pedigree based on information in a story problem.                                                                                                             | <b>1</b>                      | <b>1</b>                  |
| Distinguish between dominant, recessive, autosomal, X-linked, and cytoplasmic modes of inheritance.                                                                  | <b>1</b>                      | <b>1</b>                  |
| Calculate the probability that an individual in a pedigree has a particular genotype.                                                                                | <b>2</b>                      | <b>1</b>                  |
| Define the terms incomplete penetrance, variable expressivity, and sex-limited phenotype, and explain how these phenomena can complicate pedigree analysis.          | <b>1</b>                      | <b>1</b>                  |
| Design genetic crosses to provide information about genes, alleles, and gene functions.                                                                              | <b>1</b>                      | <b>1</b>                  |
| Interpret the results of epistasis tests, comparing the phenotypes that result from single mutations in two different genes with the phenotype of the double mutant. | <b>0</b>                      | <b>1</b>                  |
| Use statistical analysis to determine how well data from a genetic cross or human pedigree analysis fits theoretical predictions.                                    | <b>0</b>                      | <b>1</b>                  |
| Interpret complementation tests to determine whether two mutations affect the same gene, and explain the requirements and the basis for these tests.                 | <b>0</b>                      | <b>1</b>                  |
